# Supplementary material for: Emergence of lead halide perovskite colloidal dispersions through aggregation and fragmentation: insights from the nanoscale to the mesoscale
Source: Royal Society of Chemistry journal article supplement (doi:10.1039/c8nr09853k), 2019-01-01
Supplement: c8nr09853k1.pdf [file c8nr09853k1.pdf]

## Supporting information

### Emergence of lead halide perovskite colloidal dispersions through aggregation and fragmentation: Insights from the nanoscale to the mesoscale

Shambhavi Pratap,<sup>a,b</sup> Elisabeth Keller,<sup>a</sup> and Peter Müller-Buschbaum<sup>a,c</sup>

#### UV-vis measurements

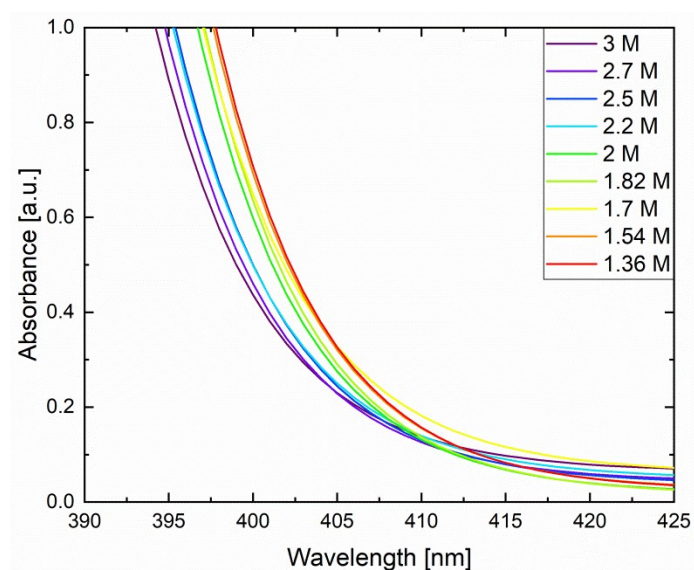

**Fig. S1** UV Vis data for MAPbBr<sub>3</sub> in regime III (high concentration) showing a red shift of the absorption tail with increasing dilution

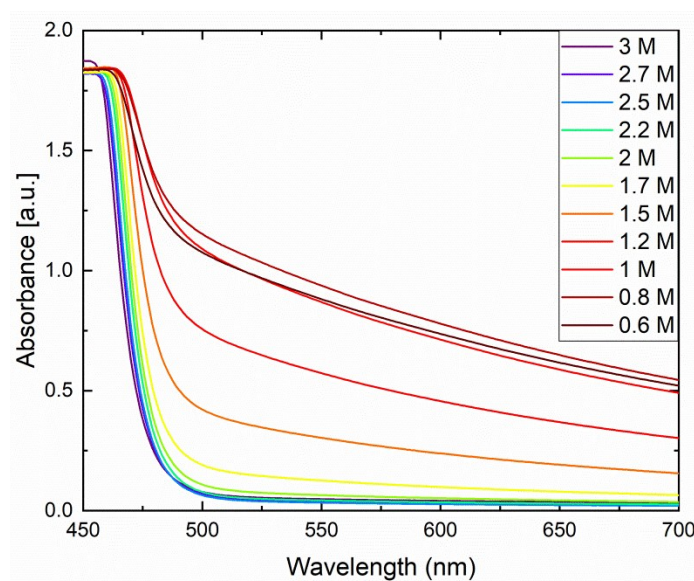

**Fig. S2** UV Vis data for MAPbI<sub>1.50</sub>Br<sub>1.50</sub> in high concentration regime showing a red shift of the absorption tail with increasing dilution, the emergent spectroscopic signature from large plumo-halide complexes.

## DLS measurements

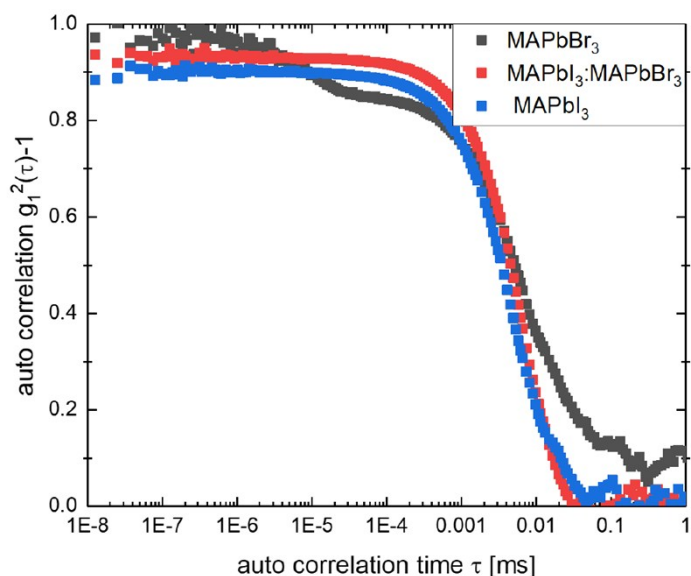

**Fig. S3** Auto-correlation functions exhibiting the decay times for the different precursors at 1M. MAPbBr<sub>3</sub> exhibits two distinct decays signifying the presence of two structures.

| Parameters               | MAPbBr <sub>3</sub> | MAPbI <sub>1.50</sub> Br <sub>1.50</sub> | MAPbI <sub>3</sub> |
|--------------------------|---------------------|------------------------------------------|--------------------|
| DLS scattering intensity | 170 kHz             | 440 kHz                                  | 430 kHz            |

**Tab. S1** Scattering intensities from DLS from precursors at 1M.

## Refractometry measurements

A Krüss Optronic Abbe refractometer from A.KRÜSS Optronic GmbH (Hamburg, Germany) was used to determine the refractive index of the individual solvents and the solvent mixture 4:1::DMF:DMSO, for obtaining the hydrodynamic radii from the DLS data.

| Solvent media | Refractive index |
|---------------|------------------|
| DMF           | 1.4285 @ 20°C    |
| DMSO          | 1.4767 @ 20°C    |
| 4:1::DMF:DMSO | 1.4385 @ 20°C    |

**Tab. S2** Refractive indices of solvent systems

## Viscosity measurements

An 'Automated Micro Viscometer' from Anton Paar GmbH (Graz, Austria) was used to determine the dynamic viscosity at 20°C and an angle of 70°. The viscosity was determined to be 1.02794 mPa @ 20°C. Underneath is also a measurement representing the evolution of viscosity of the precursor fluid (MAPbBr<sub>3</sub>) with increasing concentration.

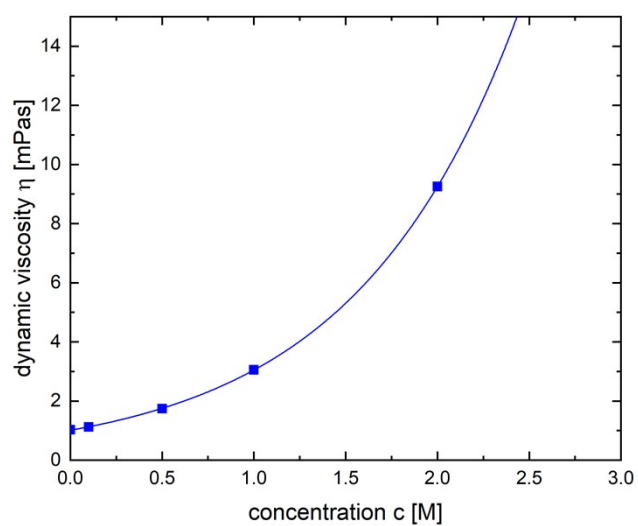

**Fig. S4** Evolution of viscosity of the MAPbBr<sub>3</sub> precursor fluid with increasing concentration.
